# Supplementary material for: Exosomes from Adipose-Derived Stem Cells Regulate M1/M2 Macrophage Phenotypic Polarization to Promote Bone Healing via miR-451a/MIF
Source: Research Square preprint supplement (doi:10.21203/rs.3.rs-876298/v1), 2021-09-16
Supplement: Supplementary file 1 [file 044f62cf78e0c1178b18445f.docx]

**Supplementary Table S1** Primer sequences for RT-qPCR

| Gene | Forward primer (5′–3′） | Reverse primer (5′–3′) |
| --- | --- | --- |
| CD86 | GTTTCATTCCCTGATGTTACGAG | GAGAAAGGTGAAGATAAAAGCCG |
| CD206 | TGATACCTGCGACAGTAAACGA | CTTGCAGTATGTCTCCGCTTC |
| CD163 | TCGCTCATCCCGTCAGTCA | CCGCTGTCTCTGTCTTCGCT |
| iNOS | CAGGACTCACAGCCTTTGGAC | TGGATGTCGGACTTTGTAGATTC |
| IL-10 | GAGAGAAGCTGAAGACCCTCTG | TCATTCATGGCCTTGTAGACAC |
| CXCL-10 | CCGGAATTCGAGCCTACAGCAGAGGAACC | CCGCTCGAGTTTGCTCCCCTCTGGTTTTA |
| TNF-α | GCGACGTGGAACTGGCAGAAG | GCCACAAGCAGGAATGAGAAGAGG |
| Arg-1 | TAACCTTGGCTTGCTTCGGAACTC | GGCGCATTCACAGTCACTTAGG |
| miR-451a | GAAACCGTTACCATTACTGAG | -- |
| MIF | CCGGACAGGGTCTACATCAAC | TTAGGCGAAGGTGGAGTTGTT |
| U6 | CGCTTCGGCAGCACATATAC | AAATATGGAACGCTTCACGA |
| β-actin | AGAAAATCTGGCACCACACCT | GATAGCACAGCCTGGATAGCA |

iNOS myo-inositol-1-phosphate synthase,IL-10 Interleukin-10, CXCL-10 C-X-C motif chemokine ligand 10, TNF-α tumor necrosis factor alpha,matrix metalloproteinase-1, Arg-1 arginase 1, miR-451a microRNA-451a, MIF macrophage migration inhibitory factor,RT-qPCR Reverse transcription-quantitative polymerase chain reaction
